# Supplementary material
Source: Springer Nature journal article supplement (https://www.springermedizin.de/resource/supplementary/12914_2008_53_MOESM2_ESM.pdf/9537410)

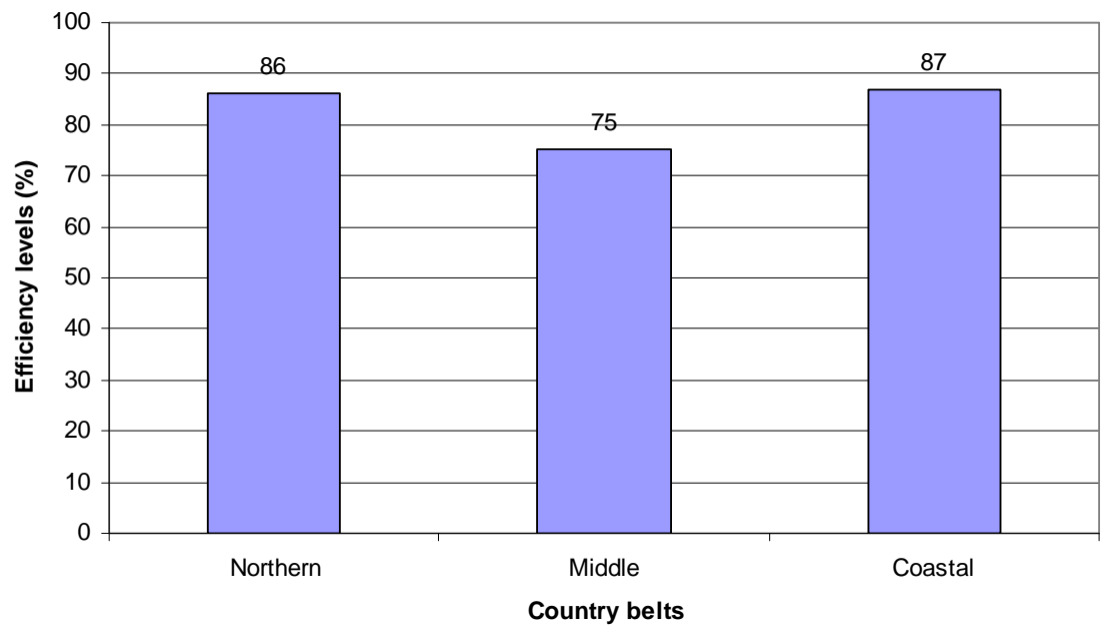

Supplement: MOESM2 [file 9537410]
